# Supplementary material for: Socio-Environmental Vulnerability to Drought Conditions and Land Degradation: An Assessment in Two Northeastern Brazilian River Basins
Source: MDPI journal article supplement (doi:10.3390/su15108029), 2023-05-15
Supplement: s1 [file s1]

Article

# Socio-Environmental Vulnerability to Drought Conditions and Land Degradation: An Assessment in Two Northeastern Brazilian River Basins

Rita Marcia da Silva Pinto Vieira <sup>1,\*</sup>, Javier Tomasella <sup>1</sup>, Ana Paula Martins do Amaral Cunha <sup>2</sup>, Alexandre Augusto Barbosa <sup>1</sup>, João Pompeu <sup>1</sup>, Yara Ferreira <sup>1</sup>, Fabrícia Cristina Santos <sup>1</sup>, Lincoln Muniz Alves <sup>1</sup> and Jean Ometto <sup>1</sup>

<sup>1</sup> Instituto Nacional de Pesquisas Espaciais, São José dos Campos 12227-010, SP, Brazil  
<sup>2</sup> Centro Nacional de Monitoramento de Desastres Naturais, São José dos Campos 12247-016, SP, Brazil  
\* Correspondence: ritamsp@gmail.com

## S1. Material and Methods

### S1.1. Correlation Matrix

Correlation matrix used to investigate the dependence between multiple variables. The variables considered were: V1 Population density, V2 Soil degradation/desertification, V3 Burn Frequence, V4 Drought recurrence, V5 Surface temperature, V6 Number days without rain, V7 Land use and land cover change, V8 Slope, V9 Soil type, V10 IDHM, V11 IVS, V12 Land tenure, V13 Conservation units, V14 Indigenous land.

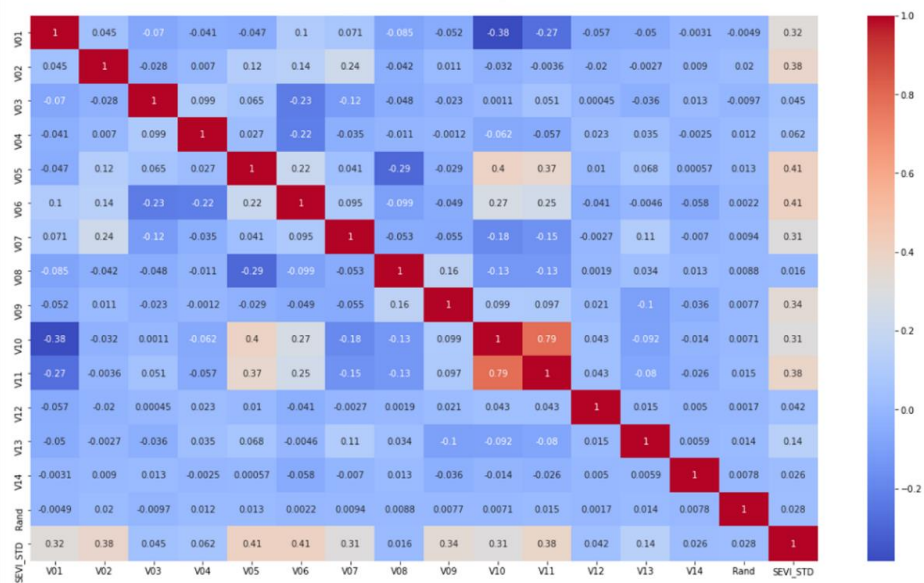

Figure S1. Variables Correlation Matrix.

### S1.2. Pearson's Chi-Square Tests

Pearson’s Chi-square test was used the test to check if the variable were statistically independent. The variables V3 Burn Frequency, V4 Drought recurrence, V8 Slope, V12 Land tenure, V13 Conservation units, V14 Indigenous land were later removed because the test indicated values above 0.50.

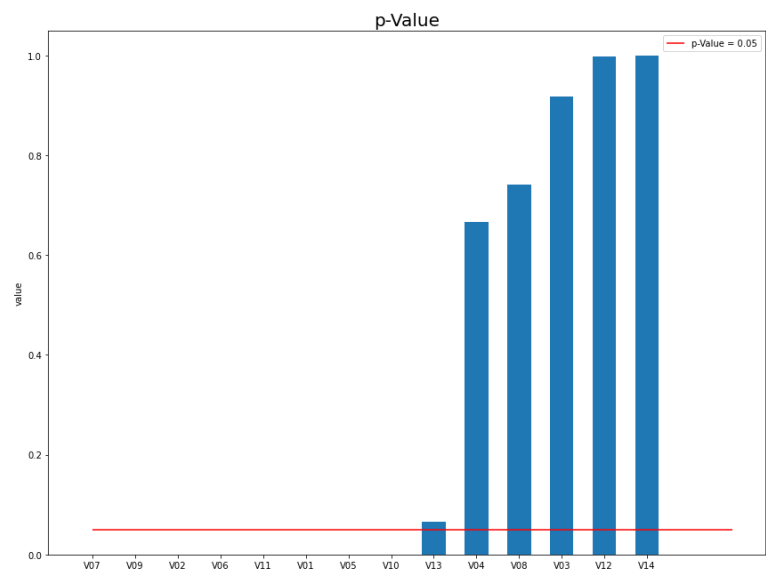

**Figure S2.** Pearson’s Chi-square tests.

S1.3. Spatial Distribution of the Variables Used to Compose the Sub-Indices

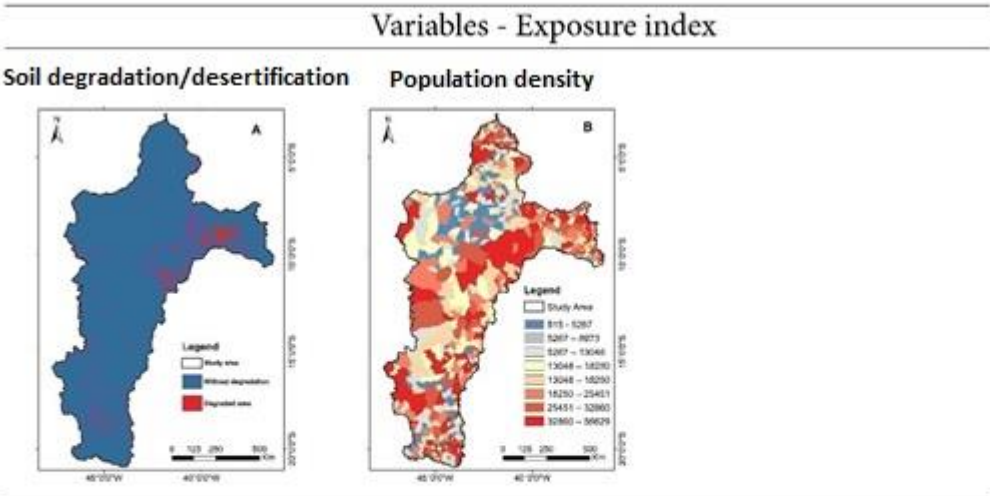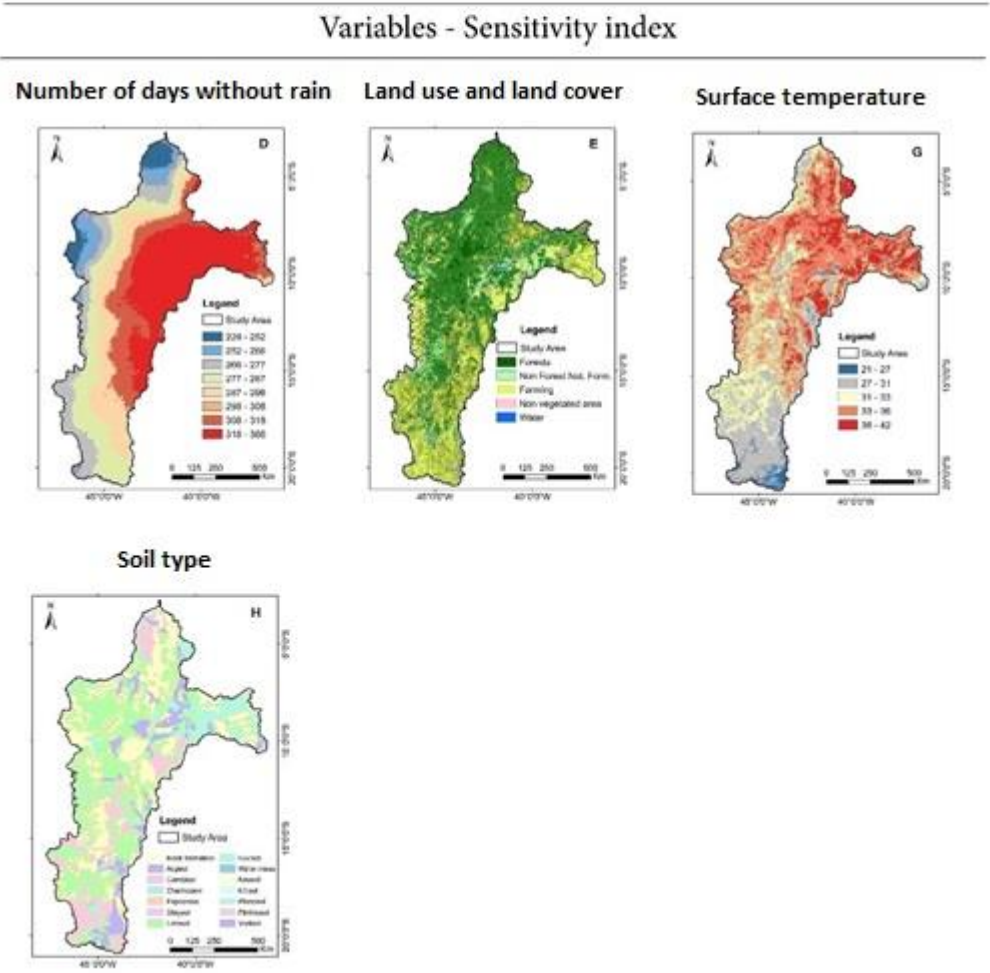

Continue

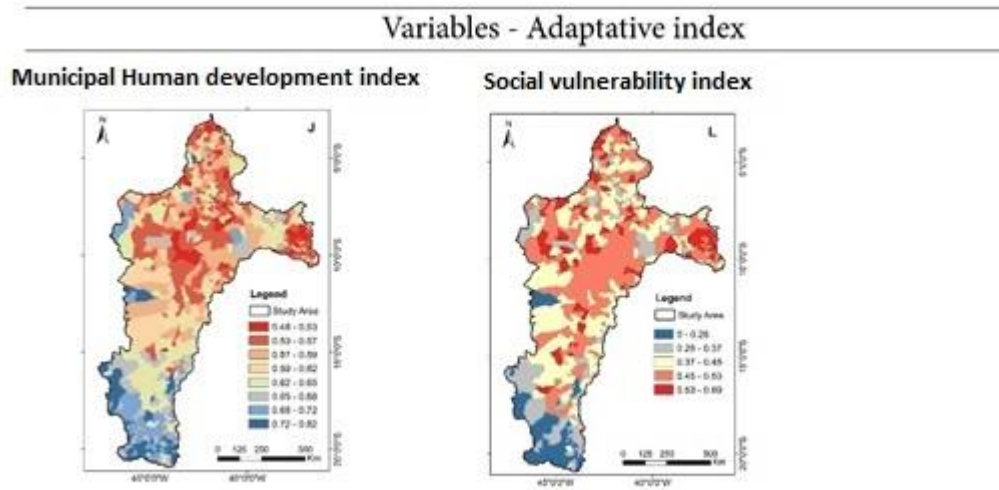

**Figure S3.** Spatial distribution of the set of variables used to compose the sub-indices.

**Table S1.** Weight table.

| <b>Slope (%)</b>                                                          | <b>Susceptibility weight</b> |
|---------------------------------------------------------------------------|------------------------------|
| >75                                                                       | 2.00                         |
| 45 - 75                                                                   | 1.80                         |
| 20 - 45                                                                   | 1.60                         |
| 8 - 20                                                                    | 1.40                         |
| 3 - 8                                                                     | 1.20                         |
| 0 - 3                                                                     | 1.00                         |
| <b>Soil Type (EMBRAPA, 1999)</b>                                          | <b>Susceptibility weight</b> |
| Latosols, organic soils, hydromorphic soils, humic soils                  | 1.00                         |
| Podzolic soils, brunizem, planosol, brunizem, structured dusky, red earth | 1.33                         |
| Cambisol, Non-cohesive soils, immature soils                              | 1.66                         |
| Laterites, rocky outcrop                                                  | 2.00                         |
| <b>Degradation map</b>                                                    | <b>Susceptibility weight</b> |
| Low degradation                                                           | 1.00                         |
| Moderate degradation                                                      | 1.50                         |
| High and Very high degradation                                            | 2.00                         |
| <b>Conservation units</b>                                                 | <b>Susceptibility weight</b> |
| Integral protection                                                       | 1.00                         |
| Sustainable use                                                           | 1.50                         |
| Non conservation unit                                                     | 2.00                         |
| <b>Indigenous land</b>                                                    | <b>Susceptibility</b>        |

|                                             | <b>weight</b>                |
|---------------------------------------------|------------------------------|
| With indigenous land                        | 1.00                         |
| Non indigenous land                         | 2.00                         |
| <b>Human development index</b>              | <b>Susceptibility weight</b> |
| 0.48 – 0.53                                 | 2.00                         |
| 0.53 – 0.57                                 | 1.84                         |
| 0.57 – 0.59                                 | 1.70                         |
| 0.59 – 0.62                                 | 1.56                         |
| 0.62 – 0.65                                 | 1.42                         |
| 0.65 – 0.68                                 | 1.28                         |
| 0.68 – 0.72                                 | 1.14                         |
| 0.72 – 0.82                                 | 1.00                         |
| <b>Population density</b>                   | <b>Susceptibility weight</b> |
| 815 – 5.267                                 | 1.00                         |
| 5.267 – 8.973                               | 1.14                         |
| 5.267 – 13.048                              | 1.28                         |
| 13.048 – 18.250                             | 1.42                         |
| 18.250 – 25.451                             | 1.56                         |
| 25.451 – 32.860                             | 1.70                         |
| 32.860 – 56.629                             | 1.84                         |
| >56.629                                     | 2.00                         |
| <b>Land use and land cover change</b>       | <b>Susceptibility weight</b> |
| Forest natural formation                    | 1.00                         |
| Beach and Dune                              | 1.00                         |
| Urban infrastructure                        | 1.00                         |
| Water                                       | 1.00                         |
| Grassland                                   | 1.20                         |
| Soy bean                                    | 1.20                         |
| Sugar cane                                  | 1.30                         |
| Perennial crop and Forest plantation        | 1.40                         |
| Wetland                                     | 1.50                         |
| Temporary crop and Other temporary crops    | 1.70                         |
| Salt flat                                   | 1.80                         |
| Other non forest formations                 | 1.80                         |
| Agriculture                                 | 1.80                         |
| Pasture                                     | 1.90                         |
| Farming (Mosaic of agriculture and pasture) | 1.90                         |
| Rocky outcrop                               | 2.00                         |
| Mining                                      | 2.00                         |
| Other non vegetated areas                   | 2.00                         |
| Non observed                                | 1.00                         |
| Aquaculture                                 | 1.80                         |
| <b>Temperature superficie</b>               | <b>Susceptibility weight</b> |
| 21 – 27                                     | 1.00                         |
| 27 – 31                                     | 1.25                         |

|                                   |                              |
|-----------------------------------|------------------------------|
| 31 – 33                           | 1.50                         |
| 33 – 36                           | 1.75                         |
| 36 – 42                           | 2.00                         |
| <b>Drought recurrence</b>         | <b>Susceptibility weight</b> |
| 0.52 – 1.04                       | 1.00                         |
| 1.04 – 1.35                       | 1.14                         |
| 1.35 – 1.60                       | 1.28                         |
| 1.60 – 1.81                       | 1.42                         |
| 1.81 – 2.00                       | 1.56                         |
| 2.00 – 2.21                       | 1.70                         |
| 2.21 – 2.44                       | 1.82                         |
| 2.44 – 3.29                       | 2.00                         |
| <b>Burn frequency</b>             | <b>Susceptibility weight</b> |
| 0                                 | 1.00                         |
| 1                                 | 1.17                         |
| 2                                 | 1.34                         |
| 3                                 | 1.50                         |
| 4                                 | 1.67                         |
| 5                                 | 1.83                         |
| 6                                 | 2.00                         |
| <b>Social vulnerability index</b> | <b>Susceptibility weight</b> |
| 0.00 – 0.28                       | 1.00                         |
| 0.28 – 0.37                       | 1.25                         |
| 0.37 – 0.45                       | 1.50                         |
| 0.45 – 0.53                       | 1.75                         |
| 0.53 – 0.69                       | 2.00                         |
| <b>Number days whitout rain</b>   | <b>Susceptibility weight</b> |
| 229-252                           | 1.00                         |
| 252-266                           | 1.14                         |
| 266-277                           | 1.28                         |
| 277-287                           | 1.42                         |
| 287-298                           | 1.56                         |
| 298-308                           | 1.70                         |
| 308-318                           | 1.84                         |
| 318-366                           | 2.00                         |
| <b>Land tenure</b>                | <b>Susceptibility weight</b> |
| Owner                             | 1.00                         |
| Tenants                           | 1.25                         |
| Settlers                          | 1.50                         |
| Borrower                          | 1.75                         |
| Occupiers                         | 2.00                         |

## S2. Results

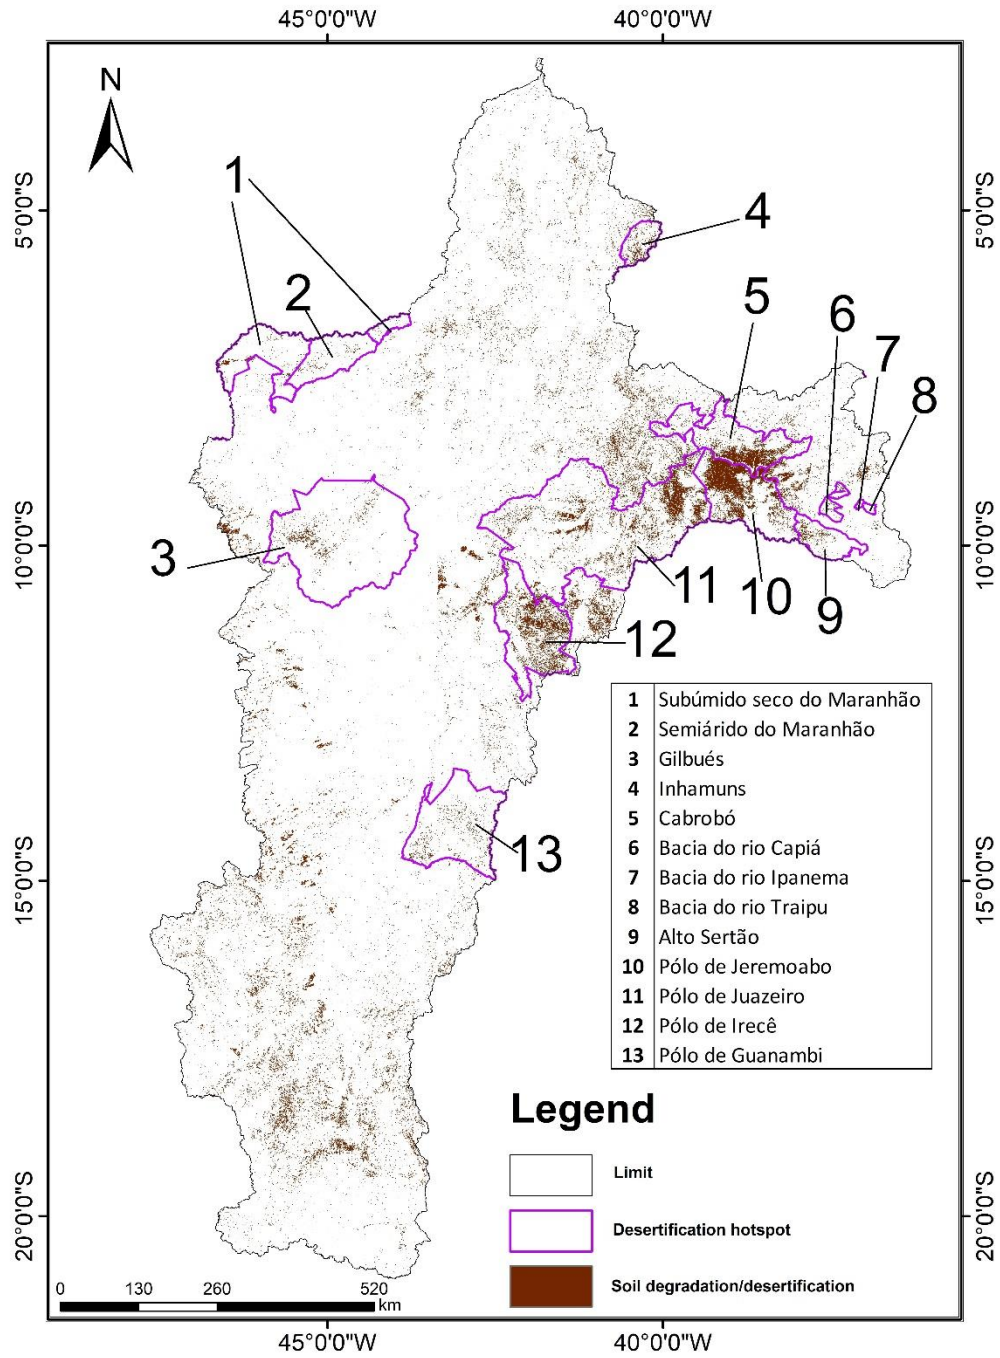

**Figure S4.** Desertification areas mapped. The areas delineated in purple indicate desertification hotspots recognized by the Brazilian environment ministry.

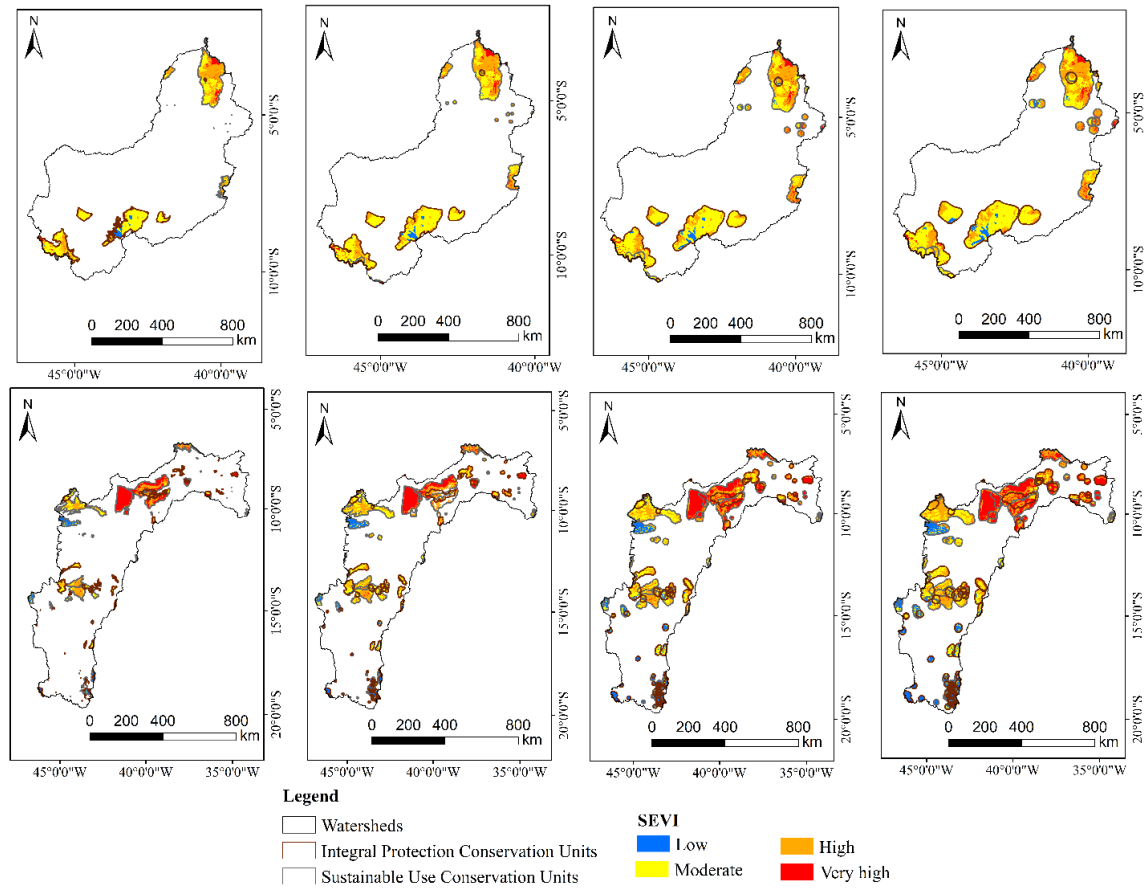

**Figure S5.** Conservation units colored according to their degree of socio environmental vulnerability within the (A) Parnaíba basin and the (B) São Francisco basin.
